# 1 **The hidden land use cost of upscaling cover crops**

2 Bryan Runck<sup>1,2</sup>, Colin K. Khoury<sup>3,4</sup>, Patrick M. Ewing<sup>5</sup>, Michael Kantar<sup>6</sup>

3

4 Affiliations:

5 <sup>1</sup>GEMS Agroinformatics Initiative, University of Minnesota, Twin Cities, St. Paul, Minnesota,  
6 USA

7 <sup>2</sup>Department of Computer Science, University of Southern California, Los Angeles, CA, USA

8 <sup>3</sup>International Center for Tropical Agriculture (CIAT), Km 17, Recta Cali-Palmira, Apartado  
9 Aéreo 6713, 763537 Cali, Colombia

10 <sup>4</sup>Saint Louis University, Department of Biology, 1 N. Grand Blvd., St. Louis, MO, 63103, USA

11 <sup>5</sup>Department of Agronomy and Plant Genetics, University of Minnesota, St. Paul, Minnesota  
12 55108

13 <sup>6</sup>Department of Tropical Plant and Soil Science, University of Hawaii at Manoa, Honolulu, HI,  
14 USA

15

16

17

18

## 19 **Abstract**

20 Cover cropping is considered a cornerstone practice in sustainable agriculture; however,  
21 little attention has been paid to the cover crop production supply chain. In this Perspective, we  
22 estimate land use requirements to supply the United States maize production area with cover  
23 crop seed, finding that across 18 cover crops, on average 3.8% (median 2.0%) of current  
24 production area would be required, with the popular cover crops rye and hairy vetch requiring as  
25 much as 4.5% and 11.9%, respectively. The latter land requirement is comparable to the annual  
26 amount of maize grain lost to disease in the U.S. We highlight avenues for reducing these high  
27 land use costs.

## 28 **The opportunities and challenges of upscaling cover crops**

29 Cover crops are commonly included in strategies aimed at increasing the sustainability of  
30 agricultural production systems (Figure 1). Grown between the harvest and next planting of cash  
31 crops, cover crops improve soil retention<sup>1</sup>, weed control<sup>2</sup>, soil physical properties<sup>3</sup>, carbon  
32 sequestration<sup>4</sup>, biocontrol services<sup>5</sup>, water quality<sup>6</sup>, and nutrient cycling<sup>7,8</sup>. They are increasingly  
33 common: from 2012 to 2017, US cover cropped area reached 6.2 million ha, a 50% increase<sup>9</sup>.  
34 This is due in part to large and coordinated investments by universities, nonprofits, and industry,  
35 which are improving and promoting the wider adoption of cover crops through research,  
36 advocacy, education, and outreach<sup>10</sup>. In spite of this uptick in adoption, just 1.7% of U.S.  
37 farmland currently incorporates a cover crop, indicating that the strategy does not yet have  
38 widespread impact in commodity crop production systems<sup>9</sup>. Recognizing this potential for  
39 growth, we step back from the field-scale benefits of cover cropping, and instead consider what  
40 infrastructure would be needed to plant cover crops widely across U.S. production areas, and  
41 what barriers remain to achieving this scale.

42           Perhaps the most fundamental need for upscaling cover crops is a robust seed industry  
43 that can provide an affordable, quality input for producers. Growing cover crops for seed in  
44 temperate agroecosystems usually requires foregoing production of traditional cash crops on the  
45 same land in the same year. This is because current cover crop species require most of a  
46 temperate growing season to reach reproductive maturity. As a result, widespread cover crop  
47 adoption would likely require significant arable land allocation for seed production, potentially  
48 forcing the conversion of farmed lands from cash crops, pasture, or natural systems to cover crop  
49 seed production (Figure 2). The potential scope and implications of such land use changes have  
50 not been quantified.

51           Therefore, we ask: how much land would cover crop seed production require if cover  
52 cropping was adopted widely across a major cash crop production area, such as the 37 million ha  
53 devoted to U.S. maize production? To answer this question, we compiled seed yields and seeding  
54 rates for 18 different cover crops from state yield trials, published literature, commercial seed  
55 catalogs, and farmer bulletins (Supplementary Data 1). These cover crops are marketed as  
56 suitable for use in the U.S.<sup>11</sup>. For each cover crop, minimum and maximum seed yield per  
57 hectare and seeding rate per hectare were used to bound the area that could be cultivated with the  
58 cover crop from a single hectare of seed production (Figure 2A), as well as the total number of  
59 hectares needed for seed production of the cover crop so as to plant the entire U.S. maize  
60 cropland (Figure 2B).

61           Assuming that the total maize hectarage does not change for any reason inherent to this  
62 transition, we find that the land requirements for production of cover crop seed would be on  
63 average 1.4 million hectares (median 746,000 ha), which is equivalent to 3.8% (median 2.0%) of  
64 the U.S. maize farmland. Rye (*Secale cereale* L.) – a midrange seed yielding cover crop and one

65 of the most commonly used in the corn belt, would require as much as 1,661,000 hectares (4.5%  
66 of maize farmland), while hairy vetch (*Vicia villosa* Roth) – the lowest seed yielding – would  
67 require as much as 4,415,000 hectares (11.9% of maize farmland).

## 68 **Cover crop seed production scenarios**

69 For the sake of illustration, we introduce two hypothetical scenarios for land use  
70 conversion for cover crop seed production, with the caveat that these scenarios do not consider  
71 all variables that go into real-world upscaling of seed production for covers. In scenario one, we  
72 consider direct competition of land between maize production and cover crop seed production  
73 and assume no change in yield due to cover cropping. If based on 2019 average maize yield data  
74 we converted land used for maize production to cover crop seed production, rye seed production  
75 would result in as much as 16,459,200 MT of maize grain removed from the market, while hairy  
76 vetch seed production would result in as much as 43,525,440 MT of grain removed. This larger  
77 number is comparable to the annual amount of maize grain lost to disease in the U.S. in 2015,  
78 which amounted to 13.5% of total production<sup>12</sup>.

79 To avoid the tradeoffs caused by producing cover crop seed on current cash crop lands,  
80 alternatives may be proposed. This caused us to consider a second scenario, where cover crop  
81 seed might instead be grown on land held in the conservation reserve program (CRP), which  
82 pays farmers to restore marginal or ecologically sensitive land to native habitat<sup>13</sup>. Cover cropping  
83 the entire U.S. maize area would require the equivalent of as much as 18% (rye) to 49% (hairy  
84 vetch) of the 2019 CRP enrollment for cover crop seed production<sup>14</sup>. Using this much CRP land  
85 to produce cover crop seed would significantly disrupt the program's conservation and ecosystem  
86 services benefits. While further study would be needed, it seems unlikely that CRP or other

87 marginal lands could be used instead of cash crop land to grow cover crop seed without  
88 significant ecological tradeoffs.

89 Acknowledging that our simplified scenarios are subject to variation in real agricultural  
90 systems, they make clear the potentially large hidden land requirements of bringing cover crops  
91 to scale. U.S. maize seed production takes less than 0.5% of the land devoted to the crop, while  
92 from our available data, the higher yielding cover crop values would still take an average of 12  
93 times (median 7 times) as much land. This comparison is worthwhile because it makes concrete  
94 the abstract idea of cover crop seed yield by benchmarking to a well-established, efficient seed  
95 production system. Additionally, among the covers examined there was large variation (berseem  
96 clover as low seed yield; turnip and canola as high seed yield), it is important to note that  
97 ecosystem benefits of covers are not equal, and do not fit into a wide array of production  
98 systems. Hence ecologically and agronomically, it is preferable to plant rye or vetch over turnip,  
99 even though turnip has high seed yield<sup>15</sup>.

100 Planning for and mitigating projected land use needs for cover crop seed production may  
101 help pre-empt social conflicts over how to enhance agricultural sustainability<sup>16</sup>, which have  
102 included such high-profile disputes as food versus biofuels<sup>17</sup>. For example, arable lands (e.g.  
103 pasture) in other temperate regions that are not currently critical to food production could  
104 potentially be converted to cover crop seed production without major environmental cost, and in  
105 doing so may provide new market opportunities to farmers. While this could increase  
106 opportunities for participatory agronomy, it would also likely alter ecological services through  
107 changes in management intensity.

108           The driver behind this potential land use impact is low seed yield, acknowledging that  
109 yield estimates are highly uncertain. The United States Department of Agriculture does not keep  
110 statistics on cover crop seed yields, and agronomists researching these crops rarely report seed  
111 yields in the formal literature because the crops are most often terminated before maturity. This  
112 forced us to search for seed yield estimates in non-academic and private sources (Supplementary  
113 Data 1). Improving yield appraisals is readily achievable and would significantly improve  
114 assessments of land needed to produce cover crop seed. Yet, despite their uncertainty, these data  
115 highlight that most cover crops are almost certainly “underdeveloped” cultivated species in  
116 comparison to the generally much higher seed yields of cash crops of similar taxonomic  
117 backgrounds. Decreasing this breeding gap should reduce land use impacts of cover cropping.

118           Our results suggest that cover crop breeding research should shift to include more  
119 emphasis on increasing seed yield, in addition to environmental outcomes. Only a handful of  
120 cover crops are actively being bred for seed productivity (e.g., pennycress and camelina<sup>18</sup>). Most  
121 breeding has focused on ecosystem service values<sup>9</sup> and forage quality<sup>11</sup>. Fortunately, advanced  
122 breeding techniques, public-private partnerships, and participatory, farmer-inclusive breeding  
123 practices could make it possible to increase the tempo of plant breeding and the subsequent  
124 adoption by farmers<sup>19</sup>. In particular, breeding might focus on classic domestication syndrome  
125 traits such as non-shattering, lack of dormancy, and flowering time<sup>20</sup>. Most of these traits have a  
126 well-known genetic basis<sup>21,22</sup>. Leveraging these known traits to improve seed yields may reduce  
127 land use impacts, provide economic benefits to seed producers, and improve farmers’ access to  
128 cover crop seed.

129           One potential way to speed the achievement of breeding goals could be to explore using a  
130 CRISPR/Cas9 approach to improve specific domestication traits, while still selecting for

131 characteristics complementary to improved ecosystem service production. Rapid domestication  
132 using CRISPR/Cas9 recently has been successful in other plant species<sup>23</sup>. Specifically, the  
133 CRISPR system has been used to modify traits such as flowering, fruit size, fruit shape, plant  
134 architecture, and nutrient content in both domesticated and wild species<sup>24,25</sup>. However, a major  
135 limitation will be developing tissue culture protocols for cover crops as this has not been done  
136 and large variation exists in regeneration ability within and across species. In addition, potential  
137 regulation of these technologies in some world regions could translate into higher costs for  
138 producers.

### 139 **Next steps: targeting cover crop research investments**

140       If cover crops are to be widely planted, our analysis suggests that land use for cover crop  
141 seed production could have large and poorly understood economic, environmental, and food  
142 production impacts. While the above scenarios were primarily illustrative, they highlight two  
143 research questions that require immediate attention in order to upscale cover cropping: 1) to what  
144 extent does common agronomic knowledge actually represent the yields achieved by cover crop  
145 seed growers? And 2) if seed yields for cover crops are as low as current data suggests, to what  
146 extent can we leverage breeding to increase seed yields while simultaneously improving or at the  
147 least maintaining the fertility and other ecosystem service benefits of cover crops? The answers  
148 to these questions may help indicate whether cover crops, a commonly proposed fundamental  
149 tool for sustainable crop production, will be able to upscale for widespread adoption.

## 150 **Methods**

151 *Areal extent of seed production calculation*

152 To identify the minimum and maximum number of crop production hectares an individual  
153 hectare of seed production could provide seed for, we divided minimum and maximum seed  
154 yield per hectare by seeding rate per hectare. We then divided the total U.S. maize hectares from  
155 the National Agricultural Statistics Service (2019) by this value to calculate the total minimum  
156 and maximum hectares needed for cover crop seed production. Full data and references for the  
157 data are available in Supplementary Data 1.

### 158 **Data Availability**

159 All data generated or analyzed during this study are included in this published article (and its  
160 supplementary information files).

161

### 162 **Author Contributions**

163 B.R, C.K.K., P.E., M.B.K. conceptualized the idea and wrote the main manuscript text and MBK  
164 prepared figures. All authors reviewed the manuscript.

165

### 166 **Competing Interests**

167 The Authors declare no competing interests.



## 168 **References**

- 169 1. Singer, JW et al. Are cover crops being used in the US corn belt? *Journal of Soil and*  
170 *Water Conservation*, 62(5), 353-358, (2007).
- 171 2. Johnson, G.A. et al. Cover Crop Management and Weed Control in Corn (*Zea mays*).  
172 *Weed Technology*, 7(2), 425-430, (1993).
- 173 3. Blanco-Canqui, H. et al. Addition of cover crops enhances no-till potential for improving  
174 soil physical properties. *Soil Science Society of America Journal*, 75(4), 1471-1482,  
175 (2011).
- 176 4. Poeplau, C. and Don A. Carbon sequestration in agricultural soils via cultivation of cover  
177 crops—A meta-analysis. *Agriculture, Ecosystems & Environment*, 200, 33-41 (2015).
- 178 5. Lin, B.B. Resilience in agriculture through crop diversification: Adaptive management  
179 for environmental change. *BioScience*, 61(3), 183-193, (2011).
- 180 6. Strock, J.S. et al. Cover cropping to reduce nitrate loss through subsurface drainage in the  
181 northern US Corn Belt. *Journal of environmental quality*, 33(3), 1010-1016 (2004).
- 182 7. Seifert, C.A. et al. Satellite detection of cover crops and their effects on crop yield in the  
183 Midwestern United States. *Environmental Research Letters*, 13(6), 064033 (2018).
- 184 8. Drinkwater LE and Snapp SS. Nutrients in agroecosystems: rethinking the management  
185 paradigm. *In: Advances in Agronomy. Elsevier*, 163–186. (2007)
- 186 9. US Department of Agriculture National Agricultural Statistics Service. 2017 Census of  
187 Agriculture. Chapter 2, Table 41 – Land Use Practice. Available at [www.nass.usda.gov](http://www.nass.usda.gov).  
188 Accessed November 5, 2019.
- 189 10. Brummer E.C., et al. Plant breeding for harmony between agriculture and the  
190 environment. *Frontiers in Ecology and the Environment* 9:561–568 (2011).
- 191 11. Wayman S., et al. Organic and conventional farmers differ in their perspectives on cover  
192 crop use and breeding. *Renewable Agriculture and Food Systems*, 32(4), 376-385 (2017).
- 193 12. Mueller D.S., et al. Corn yield loss estimates due to diseases in the United States and  
194 Ontario, Canada from 2012 to 2015. *Plant health progress*, 17(3), 211-222 (2016).
- 195 13. Hellerstein D.M. The US Conservation Reserve Program: the evolution of an enrollment  
196 mechanism. *Land Use Policy*, 63, 601-610 (2017).
- 197 14. US Department of Agriculture, Farm Service Agency. Conservation reserve program  
198 monthly summary – September, 2019. Available at [www.fsa.usda.gov](http://www.fsa.usda.gov). Accessed  
199 November 5, 2019.
- 200 15. Noland, R. L. et al. Establishment and function of cover crops interseeded into corn. *Crop*  
201 *Science*, 58(2), 863-873 (2018).
- 202 16. Pretty J. et al. Global assessment of agricultural system redesign for sustainable  
203 intensification. *Nature Sustainability*, 1(8), 441 (2018).
- 204 17. Tomei J. and Helliwell, R. Food versus fuel? Going beyond biofuels. *Land use policy*, 56,  
205 320-326 (2016).

- 206 18. Ott M.A. et al. Economics and agronomics of relay-cropping pennycress and camelina  
207 with soybean in Minnesota. *Agronomy Journal*, 111(3), 1281-1292 (2019).
- 208 19. Runck B.C. et al. The reflective plant breeding paradigm: A robust system of germplasm  
209 development to support strategic diversification of agroecosystems. *Crop Science*, 54(5),  
210 1939-1948 (2014).
- 211 20. Harlan, J.R. et al. Comparative evolution of cereals. *Evolution* 27: 311–325 (1973).
- 212 21. Kantar M.B et al. The genetics and genomics of plant domestication. *BioScience*, 67(11),  
213 971-982 (2017).
- 214 22. Meyer, R.S. and Purugganan M.D. Evolution of crop species: genetics of domestication  
215 and diversification. *Nature reviews genetics*, 14(12), 840 (2013).
- 216 23. Lemmon, ZH et al. Rapid improvement of domestication traits in an orphan crop by  
217 genome editing. *Nature plants*, 4(10), 766-770 (2018).
- 218 24. Chen, K., et al. CRISPR/Cas genome editing and precision plant breeding in  
219 agriculture. *Annual review of plant biology*, 70, 667-697 (2019).
- 220 25. Zsögön, A. et al. De novo domestication of wild tomato using genome editing. *Nature*  
221 *biotechnology*, 36(12), 1211-1216. 2018).
- 222

223 **Figure 1. Pictures of common cover crops. a** Cereal rye grown as a cover in corn residue in  
224 southern Minnesota (photograph by Michael Kantar), **b** Arizona bean field with cover crops of  
225 buckwheat and cowpeas intercropped between bean rows (Photo by Todd Horst), **c** Hairy vetch  
226 grown as a cover crop in southern Minnesota (photograph by David Hanson).

227 **Figure 2. Seed production data for common cover crops. a** Range of seed production  
228 potential from a single hectare based on commonly reported cover crop yields and seeding rates  
229 in the published literature and USDA extension **b** Zoom in of low seed yield cover crops **c** Range  
230 of area needed to support seed production based on commonly reported cover crop yields and  
231 seeding rates in the published literature and USDA extension literature. Estimates are for areal  
232 extent across the United States.

233

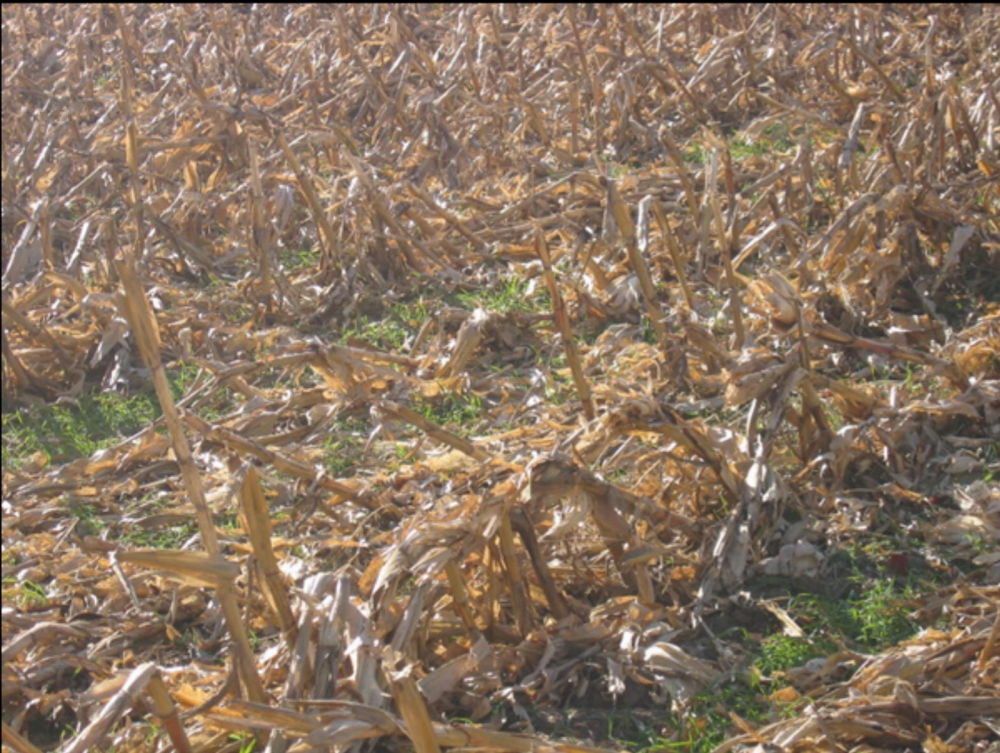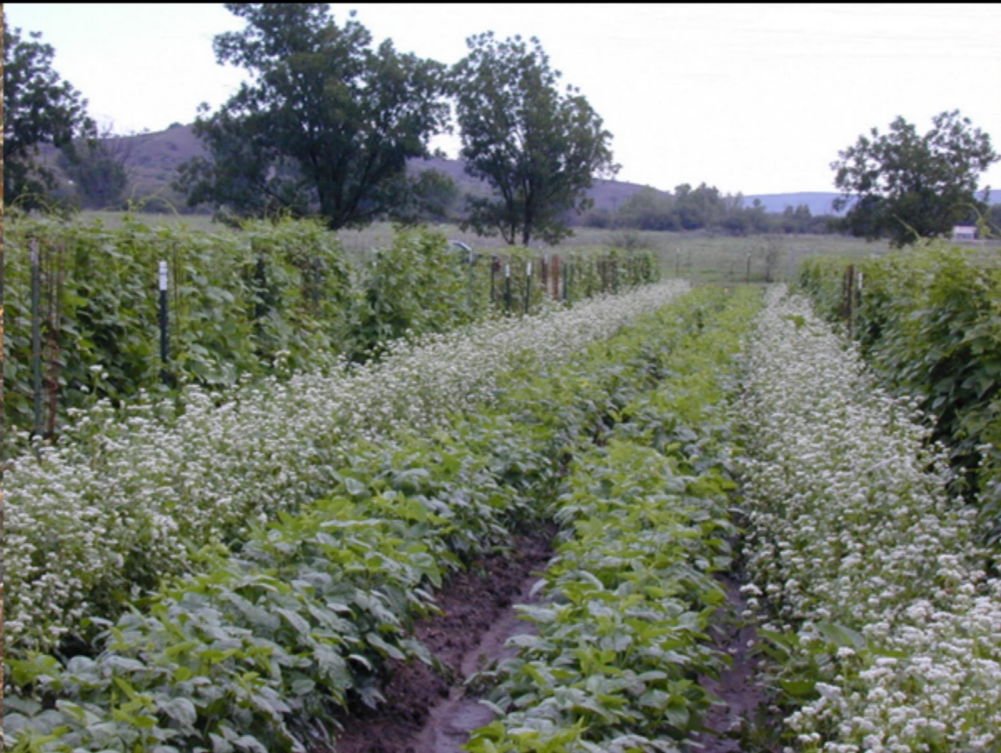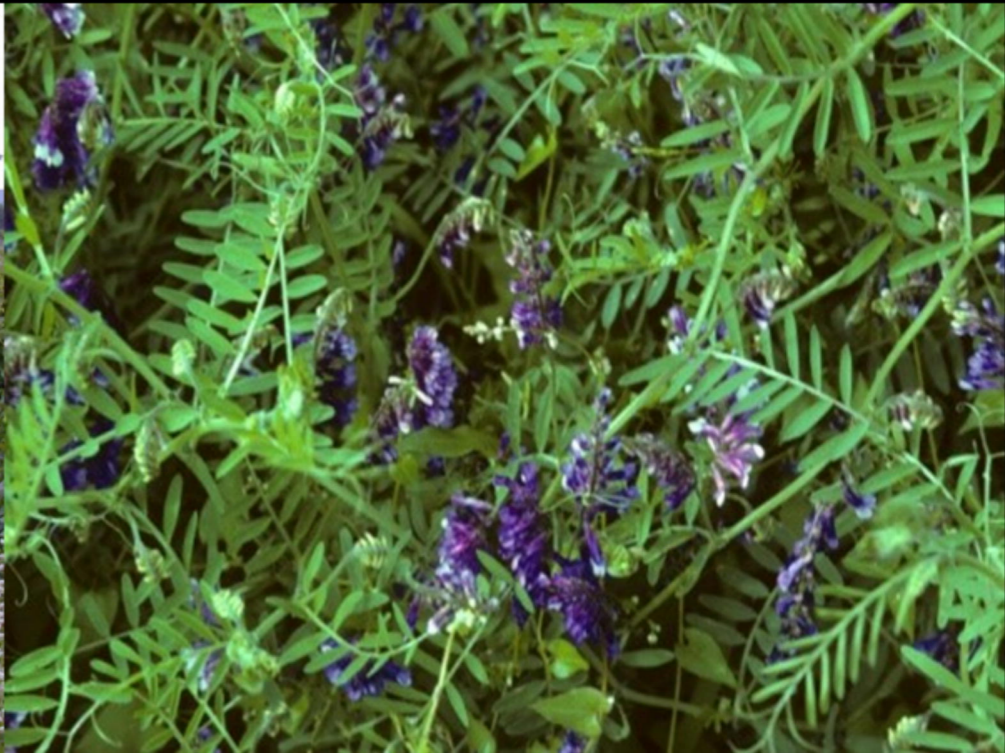

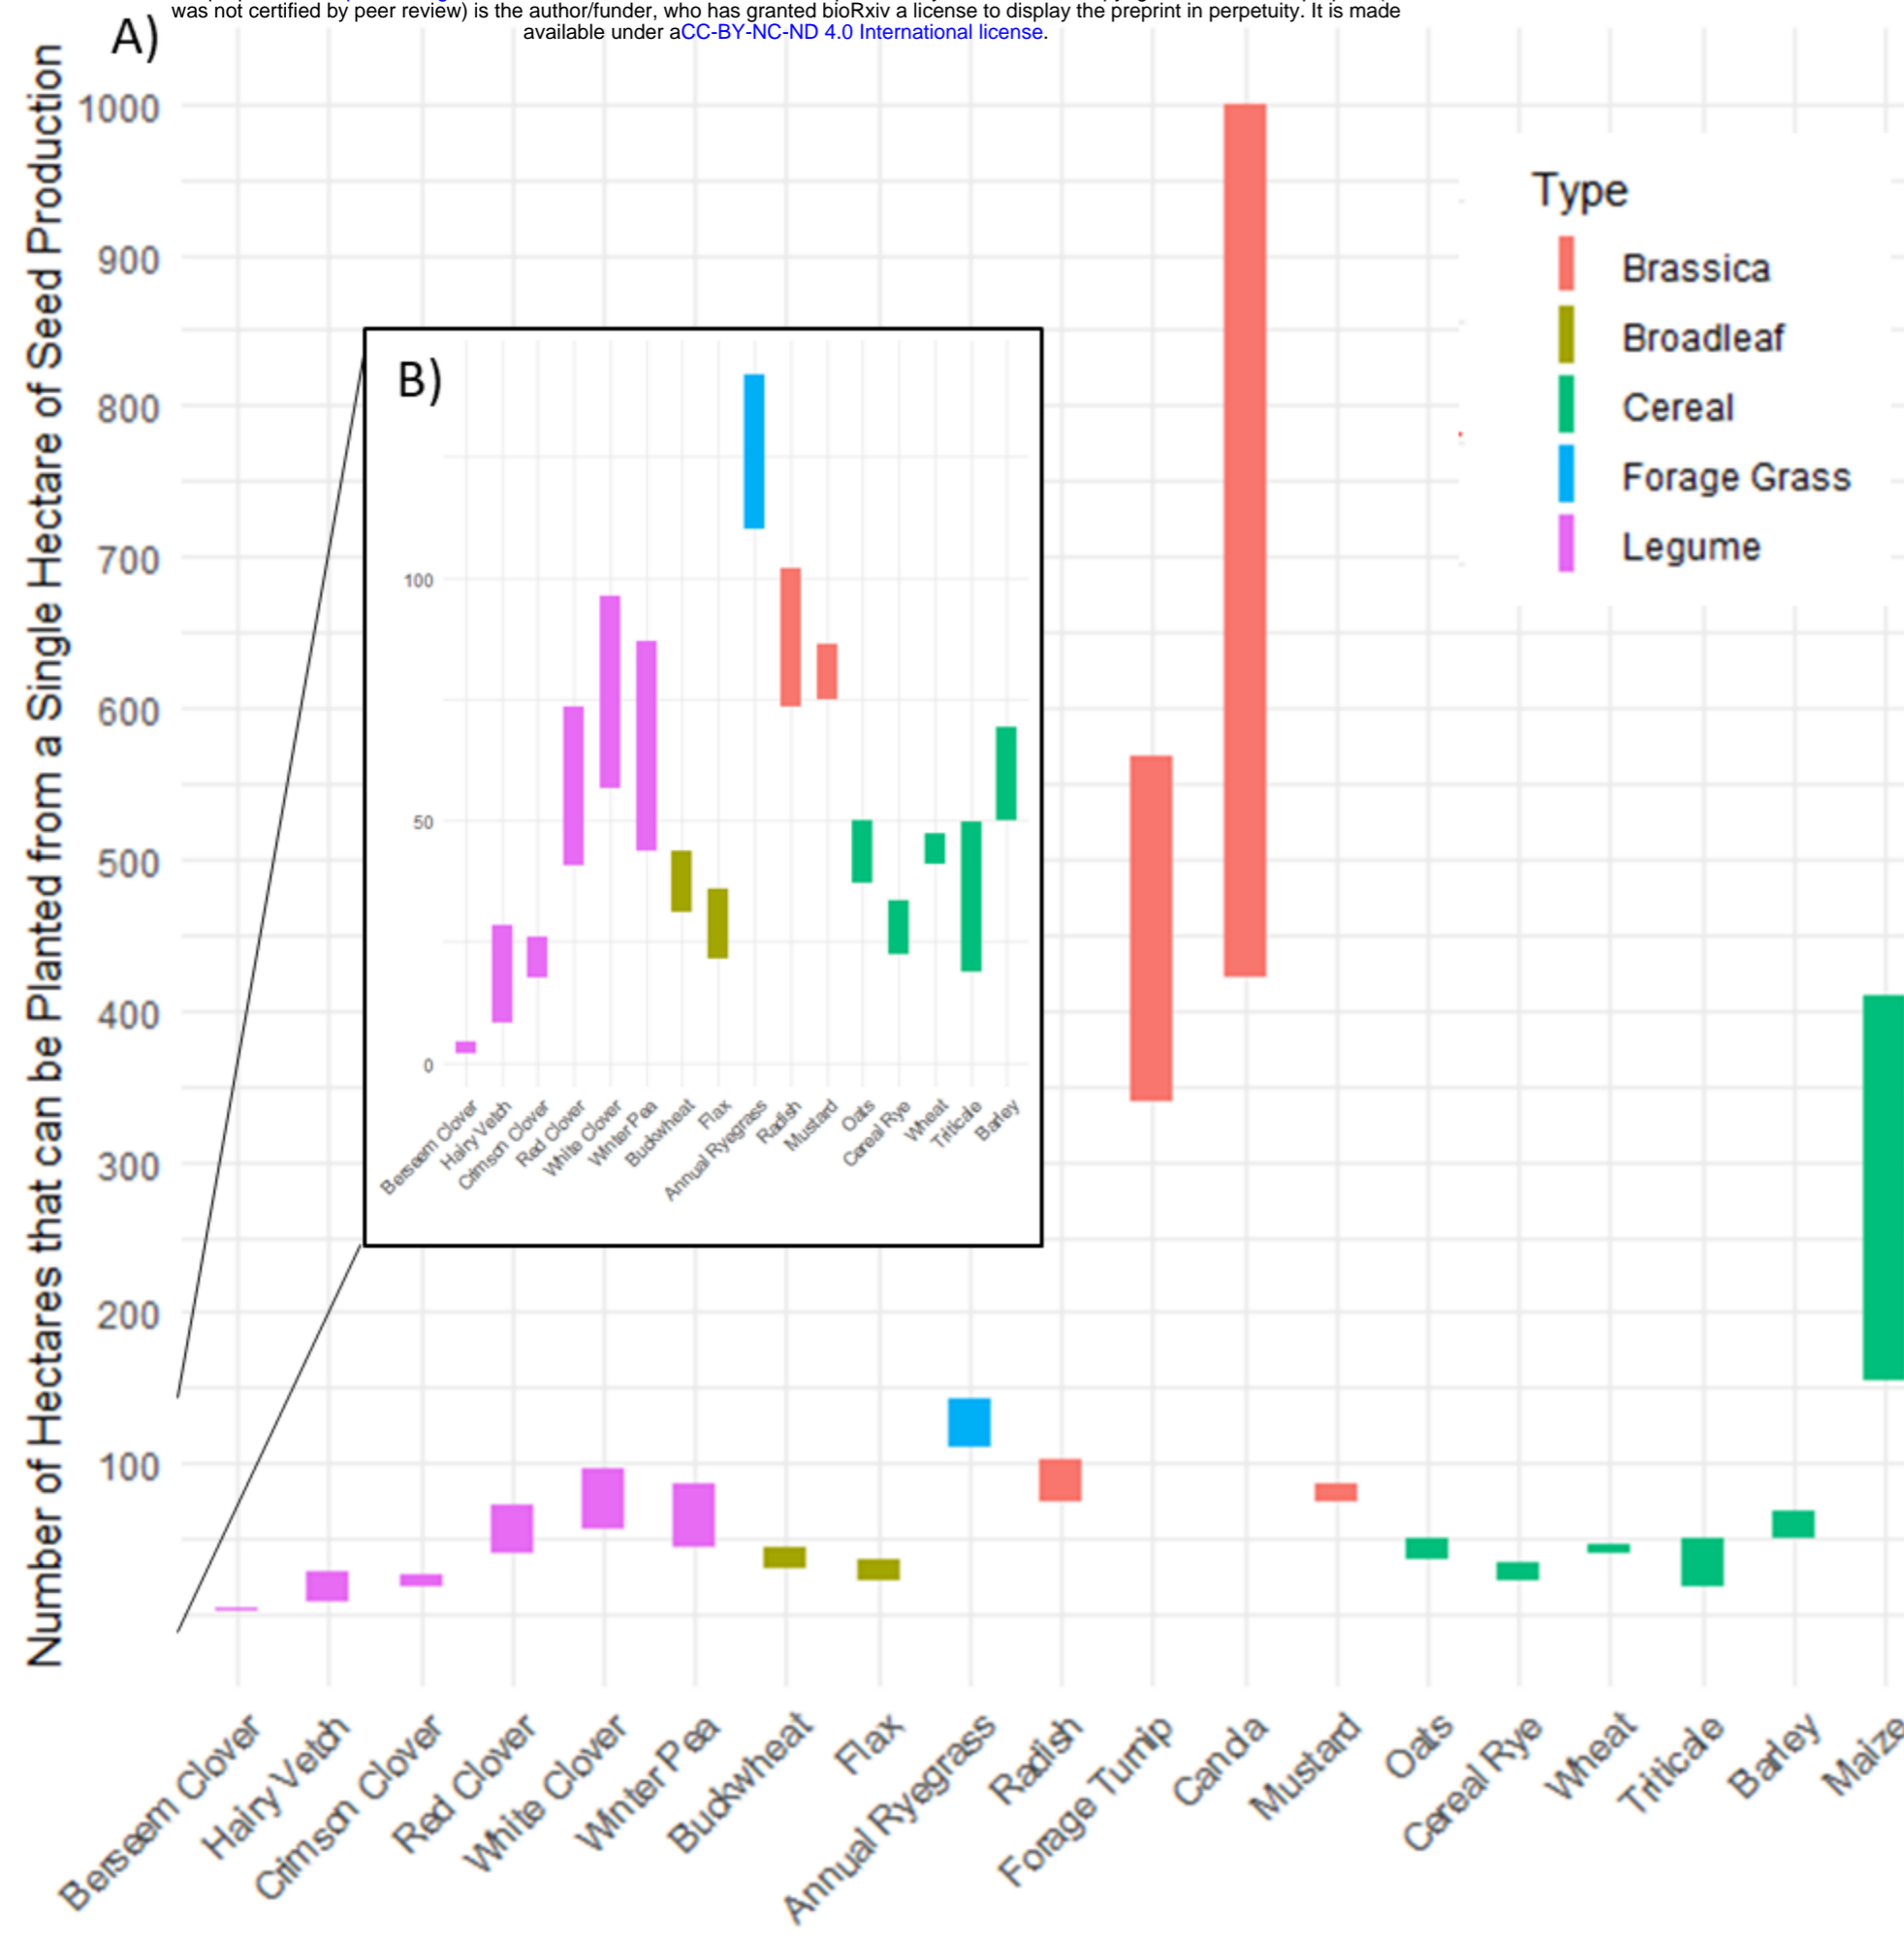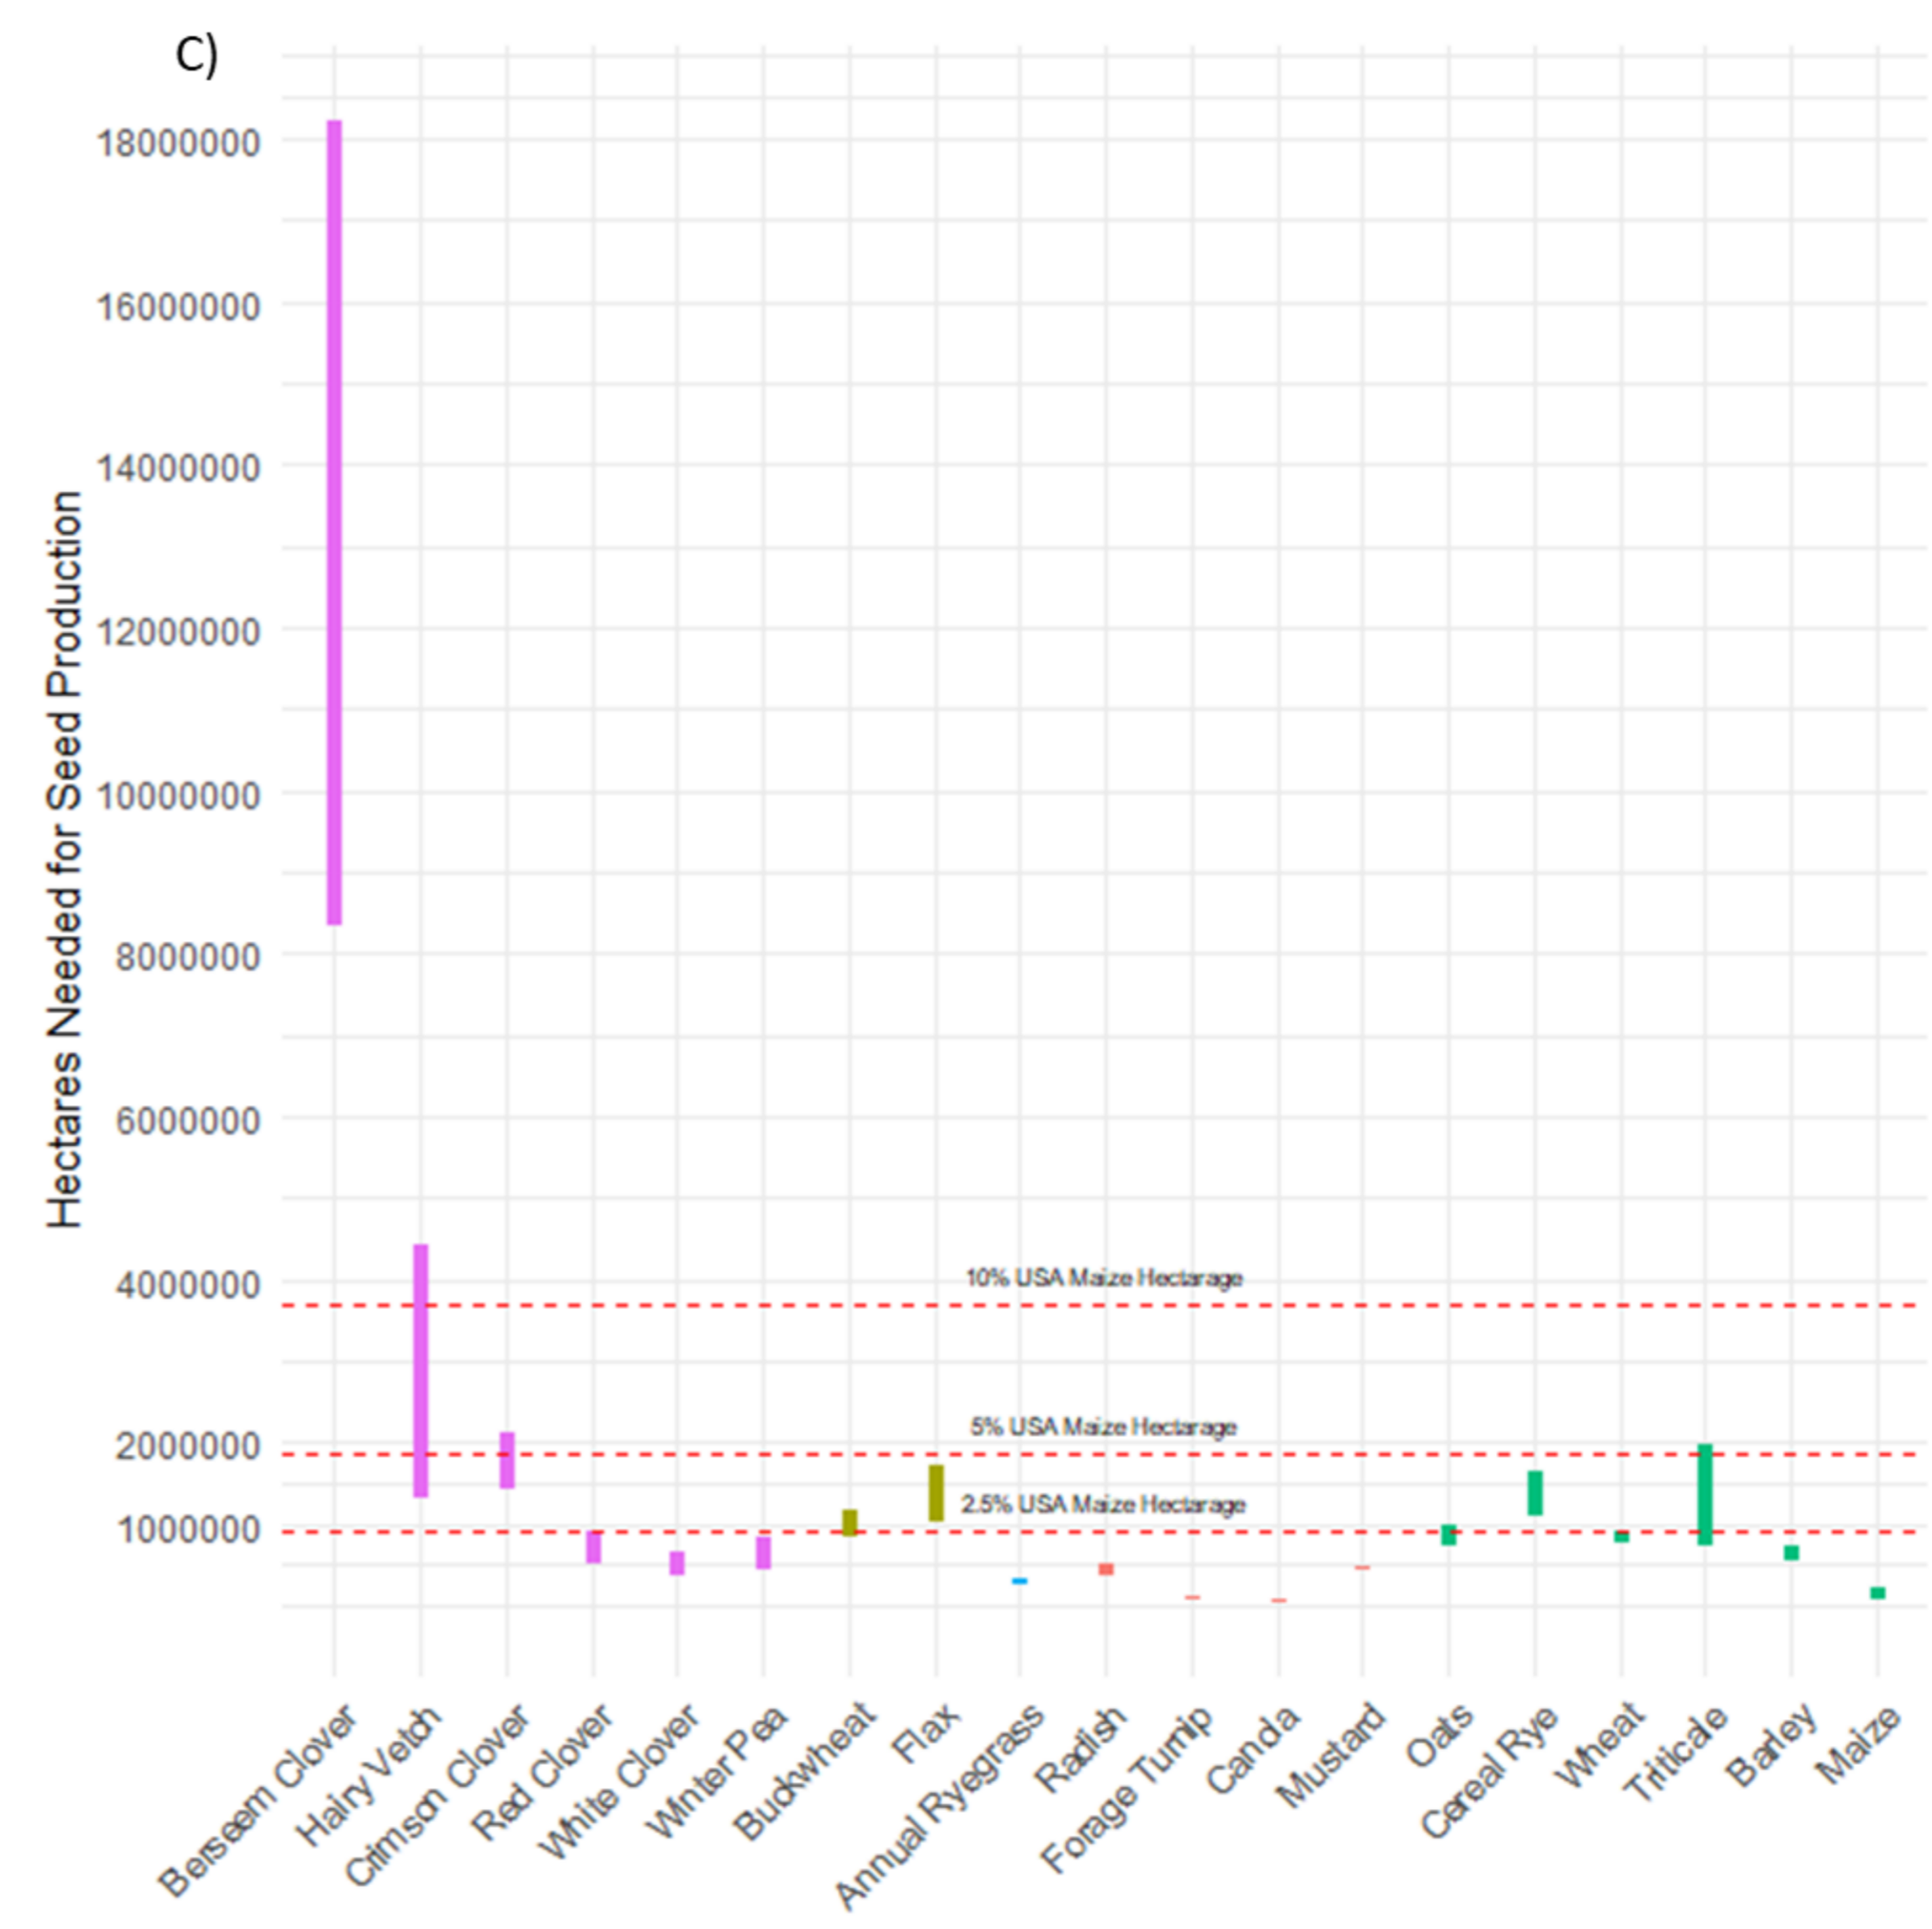

Source: http://biorxiv.org/content/10.1101/2020.02.13.947994v2.full.pdf
