# 1 **The hidden land use cost of widespread cover cropping**

2 Bryan Runck<sup>1,2</sup>, Colin K. Khoury<sup>3,4</sup>, Patrick Ewing<sup>5</sup>, Michael Kantar<sup>6</sup>

3

4 Affiliations:

5 <sup>1</sup>GEMS Agroinformatics Initiative, University of Minnesota, Twin Cities, St. Paul, Minnesota,  
6 USA

7 <sup>2</sup>Department of Computer Science, University of Southern California, Los Angeles, CA, USA

8 <sup>3</sup>International Center for Tropical Agriculture (CIAT), Km 17, Recta Cali-Palmira, Apartado  
9 Aéreo 6713, 763537 Cali, Colombia

10 <sup>4</sup>Saint Louis University, Department of Biology, 1 N. Grand Blvd., St. Louis, MO, 63103, USA

11 <sup>5</sup> Department of Agronomy and Plant Genetics, University of Minnesota, St. Paul, Minnesota  
12 55108

13 <sup>6</sup>Department of Tropical Plant and Soil Science, University of Hawaii at Manoa, Honolulu, HI,  
14 USA

15

16

17

18

## 19 **Abstract**

20           Cover cropping is a cornerstone of sustainable agriculture, however, little attention is  
21 paid to the cover crop production supply chain. Here we explore land use requirements to supply  
22 the United States maize production area with cover crop seed, identifying an average 5.4% of  
23 current production area being required, with the most popular species of hairy vetch requiring  
24 11.9%. We then highlight avenues for avoiding this high land use cost.

## 25 **Main Text**

26           Cover crops are commonly included in strategies aimed at increasing the sustainability of  
27 agricultural production systems. Their environmental and societal benefits include improved soil  
28 retention [1], weed control [2], soil physical properties [3], carbon sequestration [4], biocontrol  
29 services [5], water quality [6], and nutrient cycling [7,8]. Universities, nonprofits, and industry  
30 are all now working to achieve wider adoption of cover crops through a mixture of research,  
31 advocacy, education, and outreach [9]. In part, these efforts have contributed to an increase of  
32 2.0 million ha of cover crops planted in the U.S. from 2012 and 2017, with total cover crop  
33 hectareage reaching 6.2 million ha as of 2017 [10]. Yet, in spite of this uptick in adoption, just  
34 1.7% of U.S. farmland currently incorporates a cover crop, meaning the strategy does not yet  
35 have widespread impact in commodity crop production systems [10]. Here, we step back from  
36 the field-scale benefits of cover cropping and consider what infrastructure would be needed to  
37 upscale cover cropping and what barriers remain to achieving this scale.

38           Perhaps the most foundational need for scaling cover crops is a robust seed industry that  
39 can provide an affordable and high quality input for farmers. Growing cover crops *for seed* in  
40 temperate agroecosystems usually requires foregoing production of traditional cash crops on the

41 same land in the same year because current cover crop species require most of a temperate  
42 growing season to reach reproductive maturity. As a result, widespread cover crop adoption  
43 would likely require significant arable land allocation for seed production, potentially forcing the  
44 conversion of farmed lands from cash crops, pasture, and natural systems to cover crop seed  
45 production (Figure 1). The potential scope and implications of such land use changes have not  
46 been quantified.

47         Therefore, we ask: how much land would cover crop seed production require if cover  
48 cropping was adopted widely across a major cash crop production area, such as the 34 million ha  
49 devoted to U.S. maize production? To answer this question, we compiled the generally accepted  
50 seed yields and seeding rates for 17 different cover crops from state yield trials, published  
51 literature, commercial seed catalogs, and farmer bulletins (Table S1). These cover crops are  
52 marketed as suitable for use in the U.S. [11]. For each cover crop, minimum and maximum seed  
53 yield per hectare and seeding rate per hectare were used to bound the area that could be  
54 cultivated with the cover crop from a single hectare of seed production (Figure 1A), and the total  
55 number of hectares needed for seed production of the cover crop so as to plant the entire U.S.  
56 maize cropland (Figure 1B).

57         Assuming that the total maize hectarage does not change for any reason inherent to this  
58 transition, we find that the land requirements for production of cover crop seed would be on  
59 average 2,053,407 hectares, which is equivalent to 5.6% of the U.S. maize farmland. Rye (*Secale*  
60 *cereale* L.) – a midrange seed yielding cover crop, would require 1,660,000 hectares (4.5% of  
61 maize farmland), while hairy vetch (*Vicia villosa* ssp.) – the lowest seed yielding – would require  
62 as much as 4,410,000 hectares (11.9% of maize farmland).

63           For the sake of illustration, we introduce two hypothetical scenarios for land use  
64 conversion for cover crop seed production. In scenario one, we consider direct competition of  
65 land between maize production and cover crop seed production and assume no change in yield  
66 due to cover cropping. If based on 2017 average maize yield data we converted land used for  
67 maize production to cover crop seed production, rye seed production would result in 16,400,000  
68 MT of maize grain removed from the market, while hairy vetch seed production would result in  
69 44,100,000 MT of grain removed. This larger number is comparable to the annual amount of  
70 maize grain lost to disease in the U.S. in 2015, which amounts to 13.5% of total production [12].

71           To avoid the tradeoffs caused by producing cover crop seed on current cash crop lands,  
72 alternatives may be proposed. For example, we consider a second scenario for cover crop seed  
73 production focused on the marginal lands held in the conservation reserve program (CRP), which  
74 pays farmers to restore marginal and ecologically sensitive land to native habitat [13]. Cover  
75 cropping the entire U.S. maize area would require the equivalent of 18% (rye) to 49% (hairy  
76 vetch) of the 2019 CRP enrollment for cover crop seed production [14]. Using this much CRP  
77 land to produce cover crop seed would significantly disrupt the program's conservation and  
78 ecosystem services benefits.

79           Our simple calculations and benchmark scenarios are meant to bring attention to a major,  
80 but barely recognized challenge of scaling cover crops - the considerable amount of land  
81 required for seed production. The low and uncertain seed yield reported for most cover crops is a  
82 major driver of this potential impact. Addressing projected cover crop seed production needs  
83 may help pre-empt social conflicts over how to enhance agricultural sustainability [15], avoiding  
84 major disputes that have impacted other competing land use developments, for instance such as  
85 those observed in the food versus fuel debates [16].

86           Our seed yields are estimates based on compilations from multiple sources, as the United  
87 States Department of Agriculture does not keep statistics on cover crop seed yields, and  
88 agronomists researching these crops rarely report seed yields in the formal literature because the  
89 crops are most often terminated before maturity. Improved data would refine our land use  
90 estimates. Still, these data highlight that cover crops are “under developed” cultivated species in  
91 comparison to the generally much higher seed yields of cash crops of similar taxonomic  
92 backgrounds.

93           Our results suggest that cover crop breeding research should shift to emphasize increased  
94 seed yield. Only a handful of cover crops are actively being bred for seed productivity (i.e.,  
95 Pennycress and Camelina; [17]). Most breeding has focused on ecosystem service values [9] and  
96 forage quality [11], with seed yields holding little to no priority. Fortunately, advanced breeding  
97 techniques and public-private partnerships make it possible to increase the tempo of plant  
98 breeding and the subsequent adoption by farmers [18]. In particular, breeding might focus on  
99 classic domestication syndrome traits such as non-shattering, lack of dormancy, and flowering  
100 time [19]. Most of these traits have a well-known genetic basis [20,21]. Leveraging these  
101 abilities to improve seed yields may reduce land use impacts, provide economic benefits to seed  
102 producers, and improve access to cover crop seed.

103           For cover crops to be widely planted, our analysis suggests that land use for cover crop  
104 seed production will have large and poorly understood economic, environmental, and food  
105 production impacts. Two research areas need immediate attention in order to move forward with  
106 planning for scaling cover crops: 1) to what extent does common agronomic knowledge actually  
107 represent the yields achieved by cover crop seed growers? And 2) if seed yields for cover crops  
108 are as low as found in our compilation of data sources, to what extent can we leverage breeding

109 to increase seed yields while simultaneously improving the fertilizer and other ecosystem service  
110 benefits of cover crops? The answers may help indicate whether cover crops, an essential  
111 strategy for sustainable crop production, will be able to move from theory to practice.

## 112 **Methods**

### 113 *Areal extent of seed production calculation*

114 To identify the total number of hectares an individual hectare of seed production could crop we  
115 divided maximum yield and minimum yield by seeding rate. To calculate the number of hectares  
116 needed to produce cover crop seed for the entire U.S. maize hectarage, total U.S. hectares from  
117 the National Agricultural Statistics Service was multiplied by the seeding rate for each cover  
118 crop per hectare, then divided by minimum yield and maximum yield identified in the literature  
119 to identify the range of production extents needed to plant each individual cover. This seed  
120 production area was then divided by total cropped maize hectarage across the United States to  
121 identify the percent of hectarage of maize production that cover crop seed production would be  
122 equivalent to.

123

124 **Figure 1. A)** Range of seed production potential from a single hectare based on commonly  
 125 reported cover crop yields and seeding rates in the published literature and USDA extension **B)**  
 126 Range of area needed to support seed production based on commonly reported cover crop yields  
 127 and seeding rates in the published literature and USDA extension literature. Estimates are for  
 128 areal extent across the United States.

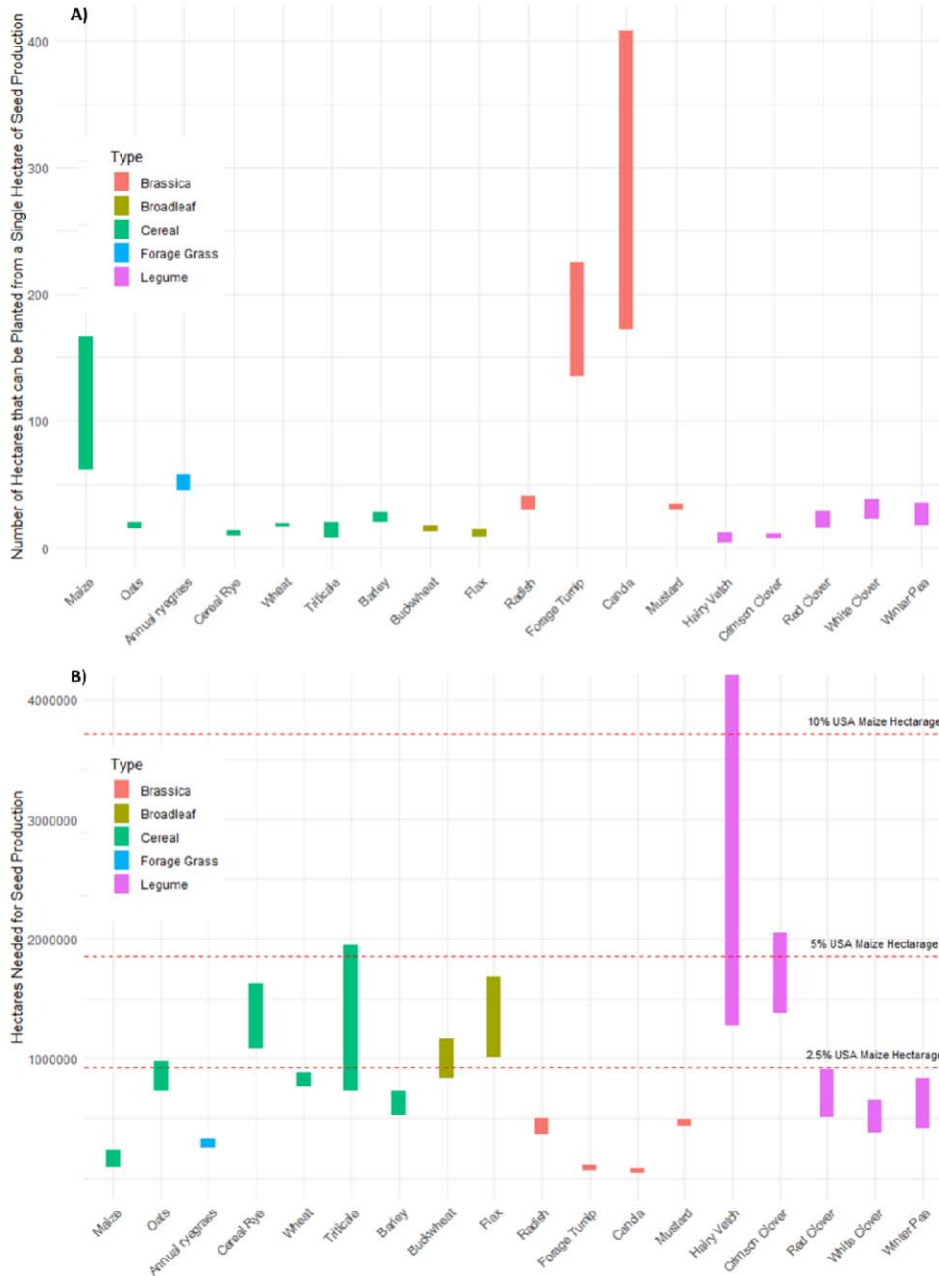

129

## 130 **References**

- 131 1. Singer, JW et al. *Journal of Soil and Water Conservation*, 62(5), 353-358, (2007).  
132 2. Johnson, G.A. et al. *Weed Technology*, 7(2), 425-430, (1993).  
133 3. Blanco-Canqui, H. et al. *Soil Science Society of America Journal*, 75(4), 1471-1482,  
134 (2011).  
135 4. Poelau, C. et al. *Agriculture, Ecosystems & Environment*, 200, 33-41 (2015).  
136 5. Lin, B.B. *BioScience*, 61(3), 183-193, (2011).  
137 6. Strock, J.S. et al. *Journal of environmental quality*, 33(3), 1010-1016 (2004).  
138 7. Seifert, C.A. et al. *Environmental Research Letters*, 13(6), 064033 (2018).  
139 8. Drinkwater LE and Snapp SS. *In: Advances in Agronomy. Elsevier*, 163–186. (2007)  
140 9. Brummer E.C., et al. Plant breeding for harmony between agriculture and the  
141 environment. *Frontiers in Ecology and the Environment* 9:561–568 (2011).  
142 10. US Department of Agriculture National Agricultural Statistics Service. 2017 Census of  
143 Agriculture. Chapter 2, Table 41 – Land Use Practice. Available at [www.nass.usda.gov](http://www.nass.usda.gov).  
144 Accessed November 5, 2019.  
145 11. Wayman S., et al. *Renewable Agriculture and Food Systems*, 32(4), 376-385 (2017).  
146 12. Mueller D.S., et al. *Plant health progress*, 17(3), 211-222 (2016).  
147 13. Hellerstein D.M. *Land Use Policy*, 63, 601-610 (2017).  
148 14. US Department of Agriculture, Farm Service Agency. Conservation reserve program  
149 monthly summary – September, 2019. Available at [www.fsa.usda.gov](http://www.fsa.usda.gov). Accessed  
150 November 5, 2019.  
151 15. Pretty J. et al. *Nature Sustainability*, 1(8), 441 (2018).  
152 16. Tomei J. and Helliwell, R. *Land use policy*, 56, 320-326 (2016).  
153 17. Ott M.A. et al. *Agronomy Journal*, 111(3), 1281-1292 (2019).  
154 18. Runck B.C. et al. *Crop Science*, 54(5), 1939-1948 (2014).  
155 19. JHarlan, J.R. et al. *Evolution* 27: 311–325 (1973).  
156 20. Kantar M.B et al. *BioScience*, 67(11), 971-982 (2017).  
157 21. Meyer, R.S. and Purugganan M.D. *Nature reviews genetics*, 14(12), 840 (2013).



158 **Table S1. Yields and Seeding Rates of Commodity and Cover Crops.**

|                      | Maize Land Area in the USA acre in 2019 | Maize Land Area in the USA hectare in 2019 | Yield bu/acre | Yield kg/ha | Seeding Rate bu/acre | Seeding rate kg/ha | Total acres needed for seed production | Total hectares needed for seed production | Percentage of Maize acres needed for seed production | Number of acres planted from a single acre harvested | Number of hectares planted from a single hectare harvested |
|----------------------|-----------------------------------------|--------------------------------------------|---------------|-------------|----------------------|--------------------|----------------------------------------|-------------------------------------------|------------------------------------------------------|------------------------------------------------------|------------------------------------------------------------|
| Maize                | 91700000                                | 37125506                                   | 160           | 10043.2     | 0.39                 | 24.4803            | 223519                                 | 90493.52227                               | 0.24%                                                | 410                                                  | 165.9919                                                   |
| Maize low            | NA                                      | NA                                         | 60            | 3766.2      | 0.39                 | 24.4803            | 598597                                 | 242346.9636                               | 0.65%                                                | 153                                                  | 61.94332                                                   |
| Vetch low Yield      | NA                                      | NA                                         | 3.7           | 232.249     | 0.44                 | 27.6188            | 10904865                               | 4414925.101                               | 11.89%                                               | 8                                                    | 3.2388664                                                  |
| Vetch high Yield     | NA                                      | NA                                         | 12.5          | 784.625     | 0.44                 | 27.6188            | 3227840                                | 1306817.814                               | 3.52%                                                | 28                                                   | 11.336032                                                  |
| Oats low             | NA                                      | NA                                         | 58            | 3900.5      | 1.56                 | 104.91             | 2470366                                | 1000148.178                               | 2.69%                                                | 37                                                   | 14.979757                                                  |
| Oats high            | NA                                      | NA                                         | 78            | 5245.5      | 1.56                 | 104.91             | 1836939                                | 743700                                    | 2.00%                                                | 50                                                   | 20.242915                                                  |
| Annual ryegrass low  | NA                                      | NA                                         | 39.6          | 2663.1      | 0.36                 | 24.21              | 827020                                 | 334825.9109                               | 0.90%                                                | 111                                                  | 44.939271                                                  |
| Annual ryegrass high | NA                                      | NA                                         | 51.1          | 3436.475    | 0.36                 | 24.21              | 640900                                 | 259473.6842                               | 0.70%                                                | 143                                                  | 57.894737                                                  |
| cereal rye low       | NA                                      | NA                                         | 40            | 2690        | 1.79                 | 120.3775           | 4093750                                | 1657388.664                               | 4.46%                                                | 22                                                   | 8.9068826                                                  |
| cereal rye high      | NA                                      | NA                                         | 60            | 4035        | 1.79                 | 120.3775           | 2729167                                | 1104925.911                               | 2.98%                                                | 34                                                   | 13.765182                                                  |
| wheat low            | NA                                      | NA                                         | 66            | 4438.5      | 1.61                 | 108.2725           | 2232955                                | 904030.3644                               | 2.44%                                                | 41                                                   | 16.59919                                                   |
| wheat high           | NA                                      | NA                                         | 76            | 5111        | 1.61                 | 108.2725           | 1939145                                | 785078.9474                               | 2.11%                                                | 47                                                   | 19.02834                                                   |
| Triticale low        | NA                                      | NA                                         | 30            | 2017.5      | 1.61                 | 108.2725           | 4912500                                | 1988866.397                               | 5.36%                                                | 19                                                   | 7.6923077                                                  |
| Triticale high       | NA                                      | NA                                         | 80            | 5380        | 1.61                 | 108.2725           | 1842188                                | 745825.1012                               | 2.01%                                                | 50                                                   | 20.242915                                                  |
| Barley low           | NA                                      | NA                                         | 78            | 5245.5      | 1.56                 | 104.91             | 1836939                                | 743700                                    | 2.00%                                                | 50                                                   | 20.242915                                                  |
| Barley high          | NA                                      | NA                                         | 108           | 7263        | 1.56                 | 104.91             | 1326678                                | 537116.5992                               | 1.45%                                                | 69                                                   | 27.935223                                                  |
| Buckwh eat low       | NA                                      | NA                                         | 25            | 1681.25     | 0.8                  | 53.8               | 2947500                                | 1193319.838                               | 3.21%                                                | 31                                                   | 12.550607                                                  |
| Buckwh eat high      | NA                                      | NA                                         | 35            | 2353.75     | 0.8                  | 53.8               | 2105357                                | 852371.2551                               | 2.30%                                                | 44                                                   | 17.813765                                                  |

|                     |    |    |      |          |      |         |         |             |       |      |           |
|---------------------|----|----|------|----------|------|---------|---------|-------------|-------|------|-----------|
| Flax low            | NA | NA | 30   | 2017.5   | 1.39 | 93.4775 | 4245370 | 1718773.279 | 4.63% | 22   | 8.9068826 |
| Flax high           | NA | NA | 50   | 3362.5   | 1.39 | 93.4775 | 2547222 | 1031263.968 | 2.78% | 36   | 14.574899 |
| Radish low          | NA | NA | 10.3 | 692.675  | 0.14 | 9.415   | 1271845 | 514917.004  | 1.39% | 72   | 29.149798 |
| Radish high         | NA | NA | 14.3 | 961.675  | 0.14 | 9.415   | 916084  | 370884.2105 | 1.00% | 100  | 40.48583  |
| Forage turnip low   | NA | NA | 23.8 | 1600.55  | 0.07 | 4.7075  | 275210  | 111421.0526 | 0.30% | 333  | 134.81781 |
| Forage turnip high  | NA | NA | 39.7 | 2669.825 | 0.07 | 4.7075  | 164987  | 66796.35628 | 0.18% | 556  | 225.10121 |
| Canola low          | NA | NA | 38   | 2555.5   | 0.09 | 6.0525  | 215461  | 87231.17409 | 0.23% | 426  | 172.46964 |
| Canola high         | NA | NA | 90   | 6052.5   | 0.09 | 6.0525  | 90972   | 36830.76923 | 0.10% | 1008 | 408.09717 |
| Mustard low         | NA | NA | 10.5 | 706.125  | 0.14 | 9.415   | 1247619 | 505108.9069 | 1.36% | 74   | 29.959514 |
| Mustard high        | NA | NA | 12.1 | 813.725  | 0.14 | 9.415   | 1082645 | 438317.8138 | 1.18% | 85   | 34.412955 |
| Crimson clover low  | NA | NA | 4.75 | 319.4375 | 0.27 | 18.1575 | 5171053 | 2093543.725 | 5.64% | 18   | 7.2874494 |
| Crimson clover high | NA | NA | 7.05 | 474.1125 | 0.27 | 18.1575 | 3484043 | 1410543.725 | 3.80% | 26   | 10.526316 |
| Red clover low      | NA | NA | 8.55 | 574.9875 | 0.21 | 14.1225 | 2298246 | 930463.9676 | 2.51% | 40   | 16.194332 |
| Red clover high     | NA | NA | 15.4 | 1035.65  | 0.21 | 14.1225 | 1275974 | 516588.664  | 1.39% | 72   | 29.149798 |
| White clover low    | NA | NA | 7.94 | 533.965  | 0.14 | 9.415   | 1649874 | 667965.1822 | 1.80% | 56   | 22.672065 |
| White clover high   | NA | NA | 13.5 | 907.875  | 0.14 | 9.415   | 970370  | 392862.3482 | 1.06% | 95   | 38.461538 |
| Winter pea low      | NA | NA | 38.8 | 2609.3   | 0.89 | 59.8525 | 2110180 | 854323.8866 | 2.30% | 43   | 17.408907 |
| Winter pea high     | NA | NA | 77.5 | 5211.875 | 0.89 | 59.8525 | 1056452 | 427713.3603 | 1.15% | 87   | 35.222672 |

159

160
